# Supplementary material
Source: Springer Nature journal article supplement (https://www.springermedizin.de/resource/supplementary/12916_2011_569_MOESM11_ESM.pdf/9598170)

A

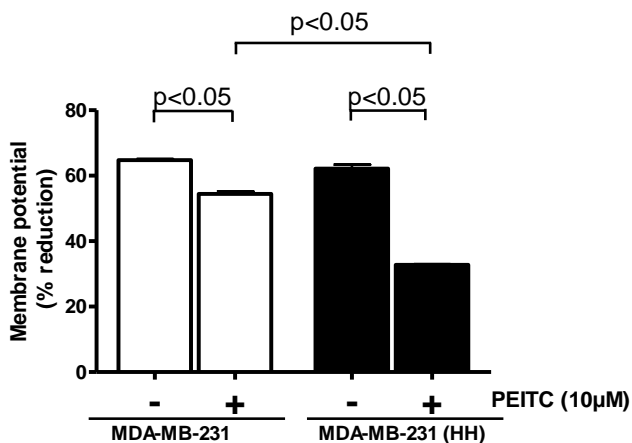

B

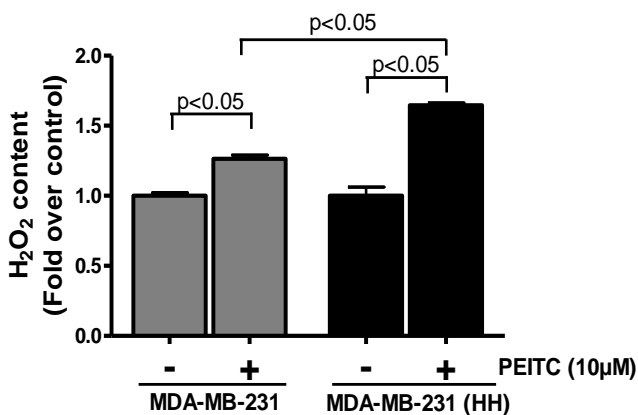

C

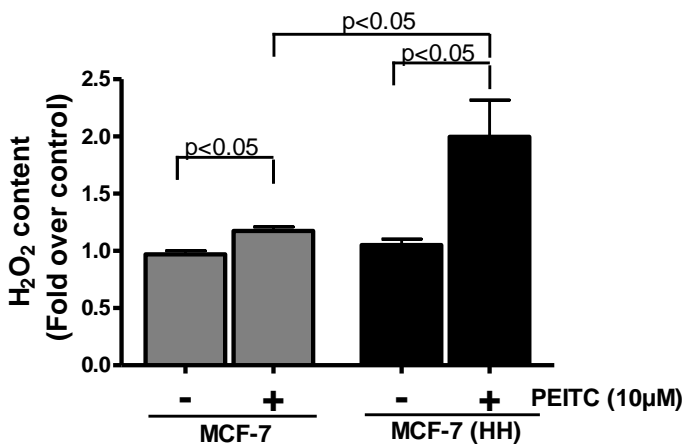

D

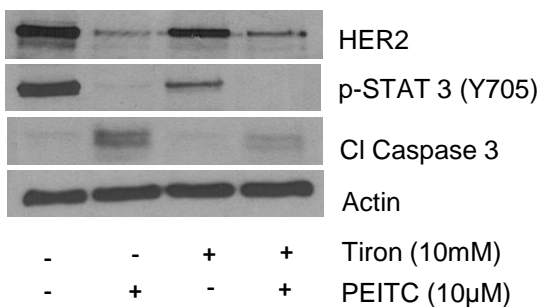

Supplement: MOESM11 [file 9598170]
